# Supplementary material
Source: PubMed Central journal article supplement (PMC5323258)
Supplement: NIHMS847945-supplement-Supplemental_Table.pdf [file NIHMS847945-supplement-Supplemental_Table.pdf]

**Supplemental Table: Any new comorbid conditions at the 12-month visit among ENERGY trial cohort**

|                                     | Intervention<br>N (%)<br>271 | Control<br>N (%)<br>245 |
|-------------------------------------|------------------------------|-------------------------|
| Acid Reflux                         | 1 (0.3%)                     | 2 (0.8%)                |
| Allergies                           | 0 (0.0%)                     | 2 (0.8%)                |
| Alopecia                            | 0 (0.0%)                     | 1 (0.4%)                |
| Arthritis/gout                      | 3 (1.1%)                     | 0 (0.0%)                |
| Breast lumps, surgery, pain, cancer | 5 (1.8%)                     | 3 (1.2%)                |
| Cancer (not breast)                 | 1 (3.7%)                     | 2 (0.8%)                |
| Cardiovascular                      | 3 (1.1%)                     | 8 (3.2%)                |
| Cysts                               | 0 (0.0%)                     | 1 (0.4%)                |
| Dental                              | 0 (0.0%)                     | 2 (0.8%)                |
| Dermatology                         | 2 (0.7%)                     | 1 (0.4%)                |
| Diabetes                            | 0 (0.0%)                     | 1 (0.4%)                |
| Endocrine                           | 1 (3.7%)                     | 2 (0.8%)                |
| Gastrointestinal                    | 1 (3.7%)                     | 0 (0.0%)                |
| Gynecology                          | 4 (1.5%)                     | 9 (3.6%)                |
| Hematology                          | 0 (0.0%)                     | 1 (0.4%)                |
| Hernia                              | 1 (3.7%)                     | 1 (0.4%)                |
| Immunodeficiency                    | 0 (0.0%)                     | 1 (0.4%)                |
| Infection                           | 4 (1.5%)                     | 2 (0.8%)                |
| Inflammation                        | 2 (0.7%)                     | 1 (0.4%)                |
| Liver Disease                       | 1 (3.7%)                     | 0 (0.0%)                |
| Lymphedema                          | 0 (0.0%)                     | 2 (0.8%)                |
| Neurological                        | 0 (0.0%)                     | 3 (1.3%)                |
| Optical                             | 1 (3.7%)                     | 2 (0.8%)                |
| Orthopedic                          | 13 (4.8%)                    | 21 (8.5%)               |
| Pain                                | 4 (1.5%)                     | 2 (0.8%)                |
| Psychological                       | 1 (3.7%)                     | 0 (0.0%)                |
| Respiratory                         | 1 (3.7%)                     | 1 (0.4%)                |
| Shortness of Breath                 | 0 (0.0%)                     | 1 (0.4%)                |
| Sleep Apnea                         | 0 (0.0%)                     | 2 (0.8%)                |
| Surgery not Breast                  | 2 (0.7%)                     | 0 (0.0%)                |
| Urological                          | 1 (3.7%)                     | 0 (0.0%)                |
| Vertigo                             | 0 (0.0%)                     | 2 (0.8%)                |
| Viral                               | 1 (3.7%)                     | 3 (1.3%)                |
